1 **Cross-Species Integration of Transcriptomic Effects of Tobacco and Nicotine Exposure**  
2 **Helps to Prioritize Genetic Effects on Human Tobacco Consumption**

3 Authors:

4 Rohan H C Palmer,<sup>1,a</sup> Chelsie E. Benca-Bachman,<sup>1,a</sup> Jason A. Bubier,<sup>2,a</sup> John E McGeary,<sup>3,4a</sup>,  
5 Nikhil Ramgiri,<sup>1</sup> Jenani Srijevanthan,<sup>1</sup> Spencer Huggett,<sup>1</sup> Jingjing Yang<sup>5</sup>, Peter Visscher, Jian  
6 Yang,<sup>6</sup> Valerie Knopik,<sup>7</sup> Elissa J. Chesler<sup>2</sup>

7 <sup>1</sup>Behavioral Genetics of Addiction Laboratory, Emory University, Atlanta, Georgia, USA

8 <sup>2</sup>Jackson Laboratories, Bar Harbor, Maine USA

9 <sup>3</sup>Department of Psychiatry and Human Behavior, Brown University, Providence, Rhode Island,  
10 USA

11 <sup>4</sup>Providence Veterans Affairs Medical Center, Providence, Rhode Island, USA

12 <sup>5</sup>Department of Human Genetics, Emory University, Atlanta Georgia, USA

13 <sup>6</sup>Institute for Molecular Bioscience, The University of Queensland, Brisbane, AUS

14 <sup>7</sup>Purdue University, Lafayette, IN, USA

15

16 Corresponding Author:

17 Rohan H. C. Palmer, PhD

18 Behavioral Genetics of Addiction Laboratory

19 Department of Psychology | Emory University

20 Atlanta, GA 30322

21 Tel: 404-727-7340

22 Email: [Rohan.Palmer@Emory.edu](mailto:Rohan.Palmer@Emory.edu)

23

---

<sup>a</sup> These authors contributed equally to this work

24 **ABSTRACT**

25 Computational advances have fostered the development of new methods and tools to integrate  
26 gene expression and functional evidence into human-genetic association analyses. Integrative  
27 functional genomics analysis for altered response to alcohol in mice provided the first evidence  
28 that multi-species analysis tools, such as GeneWeaver, can identify or confirm novel alcohol-  
29 related loci. The present study describes an integrative framework to investigate how highly-  
30 connected genes linked by their association to tobacco-related behaviors, contribute to individual  
31 differences in tobacco consumption. Data from individuals of European ancestry in the  
32 UKBiobank (N=139,043) were used to examine the relative contribution of orthologs of a set of  
33 genes that are transcriptionally co-regulated by tobacco or nicotine exposure in model organism  
34 experiments to human tobacco consumption. Multi-component mixed linear models using  
35 genotyped and imputed single nucleotide variants indicated that: (1) variation within human  
36 orthologs of these genes accounted for 2-5% of the observed heritability (meta  $h^2_{\text{SNP-Total}}=0.08$   
37 [95% CI: 0.07, 0.09]) of tobacco/nicotine consumption across three independent folds of  
38 unrelated individuals (enrichment ranging from 0.85 - 2.98), and (2) variation around (5, 10, 15,  
39 25, and 50 Kb regions) the set of co-transcriptionally regulated genes accounted for 5-36% of the  
40 observed SNP-heritability (enrichment ranging from 1.60 – 31.45). Notably, the effects of  
41 variants in co-transcriptionally regulated genes were enriched in tobacco GWAS. These findings  
42 highlight the advantages of using multiple species evidence to isolate genetic factors to better  
43 understand the etiological complexity of tobacco and other nicotine consumption.

44

45

46

## 47 INTRODUCTION

48 Contemporary thought on genetic research of complex traits in humans is that large scale  
49 genome-wide association studies (GWAS) are required to identify reproducible single nucleotide  
50 polymorphism (SNP) associations that can lead to insights into biological systems that underpin  
51 a particular phenotype. The agnostic nature of GWAS, i.e., all SNPs being tested without bias, is  
52 a strength that allows for the identification of previously unrecognized biological underpinnings.  
53 However, the GWAS approach is not without limitations. For example, examination of genome-  
54 wide variation requires a stiff penalty for multiple comparisons leading to the need for  
55 increasingly large sample sizes. The requirement of sample sizes in the 100's of thousands to  
56 millions (i.e., mega-GWAS) exerts pressure on the depth of phenotyping that may be done (i.e.,  
57 more intensive and costly phenotypes are untenable for Mega-GWAS studies). Additionally,  
58 SNPs implicated by GWAS are not always readily associated with gene function. In fact, a  
59 majority of GWAS hits fall in non-coding or intergenic regions<sup>1</sup>. Linkage disequilibrium allows  
60 for a relatively sparse coverage of the genome to be maximally informative, but simultaneously  
61 limits the immediate “translatability” of the signals (i.e., a SNP identified by GWAS may be a  
62 proxy for a causative SNP some genomic distance away). In sum, while GWAS findings have  
63 become increasingly reproducible as sample sizes increase, it has become increasingly evident  
64 that additional sources of data (e.g., gene regulatory and epigenetic data<sup>2</sup>) are needed to  
65 understand how subtle SNP effects increase risk for pathology or can be utilized in identifying  
66 critical biological mechanisms.

67 Genetic studies of tobacco consumption assume that genetic variation in the biological  
68 sample collected (e.g., blood and saliva) reflects the genetic influences in brain that mediate the  
69 psychoactive properties of nicotine and other chemicals found in tobacco products. Nicotine has

70 been shown to cause changes in neural organization, particularly in the brain's reward systems,  
71 psychomotor and cognitive processes via its ability to interact with nicotinic acetylcholine  
72 receptors (nAChRs).<sup>3; 4</sup> By altering neural circuits, especially those comprising the dopaminergic  
73 systems of the midbrain, nicotine elicits a high potential for addiction, regardless of the form in  
74 which it is marketed.<sup>5</sup> Altogether, these properties of tobacco products highlight putative genetic  
75 mechanisms that may mediate consumption. The largest tobacco consumption meta-GWAS, to  
76 date, has identified 566 genetic variants in 406 loci associated with various phenotypes related to  
77 tobacco consumption (i.e., initiation, cessation, and heaviness of use).<sup>6</sup> While the individual  
78 effects of these loci are limited, their application in the form of polygenic risk scores (PRS; i.e.,  
79 the sum weighted effect of genome-wide variants that have been shown to predict individual  
80 differences on a trait) has been shown to have some utility in predicting consumption in similarly  
81 ascertained samples.<sup>6</sup> Moreover, the variation in predictive utility of a PRS based on how the  
82 polymorphisms included are selected (e.g., p-value thresholds versus Best Linear Unbiased  
83 Predictors) underscores the need for additional lines of evidence to prioritize a subset of genome-  
84 wide signals contributing to consumption. However, short of increasing sample sizes to realize  
85 shared cumulative variant effects across subgroups of tobacco users in a GWAS, there are few  
86 methods to increase power to realize other genetic variants.

87         One approach to increase power in GWAS is the use of prioritized subsets of genomic  
88 variants while correcting for the overall genome-wide false discovery rate (FDR) using a  
89 multivariate mixed linear modeling framework. Indeed, the use of mixed models and prioritized  
90 subset approaches that fit multiple single nucleotide polymorphisms (SNPs) simultaneously have  
91 been shown to account for variation in a trait and improve power in association analyses.<sup>7</sup> The  
92 recent development and application of genomic-relatedness-matrix restricted maximum

93 likelihood (GREML<sup>8;9</sup>) to addiction phenotypes and other complex traits, provides a multivariate  
94 framework so that the joint effects of loci can be determined. Moreover, GREML enhances  
95 power to localize the source of genetic variance for complex traits by aggregating the effects  
96 across *a priori* defined regions or categories of SNPs while accounting for LD.<sup>10</sup> For instance,  
97 we applied GREML to Heroin Dependence and showed that SNPs in the 1-10% MAF range  
98 largely contribute to the known additive genetic variance even while controlling for LD.<sup>11</sup>  
99 Similarly, Brazel et al., demonstrated that exonic rare variants in and around common variants  
100 are capable of indexing upwards phenotypic and genetic variance of alcohol and nicotine  
101 consumption, respectively, albeit with varied effects across phenotypes.<sup>12</sup>

102 While there have been several advances in application of genome-wide addiction  
103 genetics, overcoming the limitation of how to integrate prior knowledge and prioritize genomic  
104 variants, outside of broad functional categories (e.g., 3' UTR, Intergenic, Rare coding, etc.),  
105 remains a critical limitation. Furthermore, lack of ready access to brain tissue in a living intact  
106 human precludes a direct understanding of tissue-specific epigenetic and/or expression  
107 differences that arise from continued exposure, which would aid in localizing expression  
108 quantitative trait loci sensitive to drug processes. In light of these concerns, the intuitive appeal  
109 of human-only genetic analysis is diminished, and suggests that another compelling approach is  
110 the use of complementary genomic data from model organism systems.

111 In this study, we evaluate the possibility of bridging between human GWAS and model  
112 organism genomics using a novel and integrative framework to answer the empirical question as  
113 to whether or not findings from model system studies may be leveraged with the human GWAS  
114 approach to speed advancements in this area. We used transcriptome-informed exposure models  
115 of tobacco/nicotine to parse genome-wide SNP-heritability estimates to test this hypothesis

116 directly. This was achieved using the GeneWeaver heterogeneous functional genomics  
117 repository and analysis system as the primary platform for integration of evidence<sup>13</sup> across  
118 existing studies.

119

## 120 **MATERIALS & METHODS**

### 121 *Building an a priori network of genes co-transcriptionally regulated by nicotine*

122 A gene set for nicotine consumption was identified using GeneWeaver<sup>14;15</sup>, a genomics  
123 data repository and analysis system. GeneWeaver integrates data from numerous databases, such  
124 as NCBI and ENSEMBL, various model organism databases (e.g., the Mouse and Rat Genome  
125 Databases, and the Zebrafish Model Organism Database) and genomic experimental results from  
126 the literature to produce curated sets of genes that can be analyzed using a suite of analytical  
127 tools.<sup>13</sup> GeneWeaver was specifically designed for integration of genomic evidence and  
128 comprises over 199,664 gene sets spanning studies across 10 species. Using GeneWeaver we  
129 identified genes of interest from several *Mus musculus*, *Rattus norvegicus*, and *Danio rerio*  
130 functional genomics (typically microarray) experiments. As of October 2019, relevant data from  
131 no other species were identified upon review of the current literature and archived experimental  
132 sets available in GeneWeaver. Figure 1 outlines the protocol for establishing separate lines of  
133 evidence for each species.

134 We first identified studies by literature review or by shared summary statistics archived  
135 in the GeneWeaver system. Experimental studies were included if they provided differential  
136 expression or whole genome co-expression network analyses along with accessible summary  
137 statistics. Literature searches focused on exposure studies utilizing nicotine-specific model  
138 organism paradigms, including subcutaneous nicotine treatment, IVSA, nicotine delivered to the

139 animal's drinking water, and nicotine-induced conditioned place preference (see Table 1; no  
140 studies involving *Drosophila melanogaster* were identified which was most likely due to the fact  
141 that nicotine is a natural insecticide). Priority was given to weighted gene co-expression network  
142 analysis (WGCNA) studies to minimize inflation of the Type I error rate typically seen in QTL  
143 studies. Next, we merged studies with multiple reported gene sets (i.e., either by region, up/down  
144 regulated, or across time) to avoid inflating the replication threshold of individual genes. We  
145 then identified orthologous genes using GeneWeaver's "Combine Gene sets" function which  
146 merges multiple gene sets into a single matrix while accounting for orthology across species;  
147 none of the identified studies were conducted in human samples.<sup>13</sup> Lastly, identified gene sets  
148 were compared to the current human genome build (hg19) to localize relevant variants that were  
149 conserved across species; 712 orthologous genes were identified. Given the lack of a proof of  
150 principle for prospectively integrating model organism evidence in human studies we integrated  
151 the limited evidence across studies, especially given the minimal overlap between gene sets  
152 (Jaccard similarity ~0.00-0.01; supplemental Table S1). Of these genes, 201 were replicated  
153 twice across GeneWeaver gene lists. For instance, ABL1 and GRIK2 were only observed in five  
154 brain regions from the Wang et al. study, but not observed in other studies. Supplementary  
155 Figure 1 provides a bipartite graph visualization of the 51 genes that were present in at least three  
156 gene lists. When collapsing across study and removing duplicates, 21 genes were observed  
157 across studies (see Supplementary Table S2). None of them overlapped across more than two  
158 studies. The analyses described below focused on SNPs in and around the 712 orthologous genes  
159 (GeneWeaver Gene Set ID: GS357552).

160 -----Insert Figure 1 here -----

161

162 -----Insert Table 1 here -----

163

164 *Fold creation and power calculation for the UK Biobank tobacco consumption sample*

165 Hypotheses were tested using multiple subsets (i.e., folds) of the UKB data for  
166 computational efficiency and to demonstrate the robustness of the findings via replication as  
167 each dataset contained unrelated individuals. Analyses focus on the reported number of  
168 cigarettes by each participant (i.e., for prior and current smokers; nonsmokers were excluded).  
169 We identified 139,043 individuals of European ancestry as identified by principal components  
170 analysis and multidimensional scaling<sup>16; 17</sup>, who were no more related than second cousins and  
171 who also provided smoking data. The number of folds were determined *a priori* in order to  
172 maximize statistical power. The GCTA-GREML Power Calculator was used to estimate *a priori*  
173 power for sample sizes that provided at least 70% power to detect SNP-heritability estimates as  
174 small as one-third of 1% (0.333%).<sup>18</sup> Power was based on the previously reported SNP-  
175 heritability and observed variance of the off-diagonal elements ( $\sim 6.68 \times 10^{-4}$ ) in each fold.<sup>6</sup>  
176 Consequently, the total sample was divided into three approximately equal folds ( $n_{\text{nic}1}=41,263$ ,  
177  $n_{\text{nic}2}=41,368$ ,  $n_{\text{nic}3}=41,213$ ), each of which was made constitutionally equivalent by randomly  
178 sampling individuals from each quartile of the nicotine consumption distribution.

179 *Genotype quality control*

180 Analyses focused on raw and imputed genotypes obtained using the Affymetrix UK  
181 BiLEVE Axiom and UK Biobank Axiom® arrays, which genotyped ~850,000 variants (details  
182 available here: <https://www.ukbiobank.ac.uk/scientists-3/genetic-data/>). Quality control and  
183 imputation (to over 90 million SNPs, indels, and large structural variants) was performed by a  
184 collaborative group headed by the Wellcome Trust Centre for Human Genetics. Analyses



185 focused on genotyped and imputed SNPs with good quality scores ( $r^2 > 0.3$ ). PLINK (version 1.9)  
186 was used to filter markers using the following criteria: genotyping rate >99%, minor allele  
187 frequency > 0.01, Hardy-Weinberg equilibrium p-value > 0.0001, and missing genotype rate <  
188 0.10.<sup>19</sup>

189

### 190 *Regions-of-Interest Heritability Mapping*

191 Given evidence for the import of intergenic variants in complex traits/disease, we  
192 partitioned the genetic variance of nicotine consumption into three regions-of-interest based on  
193 the list of genes acquired from the GeneWeaver database.<sup>20</sup> As illustrated in Figure 2, the “gene”  
194 region was demarcated by the start and stop positions of each of the consumption genes. The  
195 flanking “buffer” regions of the genome were set to encompass the base pairs directly up-/down-  
196 stream of the 5’ and 3’ ends of each gene, respectively. We considered six buffer lengths in order  
197 to capture the effects of transcription factor (TF) binding sites whose exact position is unknown  
198 (0 kilo-base pairs (kb), 5kb, 10kb, 25kb, 35kb, and 50kb). Following marker extraction, the 5’  
199 and 3’ variants for each buffer length were aggregated into a single buffer marker variant list for  
200 a given length. In addition, we examined the effects of all unselected variants (referred to as  
201 “other variants”), which belonged to regions of the genome that comprised SNP markers that  
202 were not within the parameters specified for the gene or buffer regions defined by the  
203 consumption gene set (Table 2 provides a count of the number of SNPs assigned to each  
204 component of the model). Consequently, the number of SNPs that comprised the “other variants”  
205 category varied depending on the length of the buffer regions.

206

207 -----*Insert Figure 2 here* -----

208

209           The relative contribution of variants within the gene, buffer, and ‘all other’ components  
210 was evaluated under a polygenic model. Regions-of-Interest heritability mapping was achieved  
211 using multiple genetic components in GREML analyses implemented in GCTA [version 1.92]  
212 using the set of SNPs from each ROI to define the components of the model.<sup>21; 22</sup> Analyses  
213 employed a set of three genetic relatedness matrices (GRMs) for a given fold. Variance  
214 component ROI-G reflected variation across SNPs in the transcriptionally regulated gene set  
215 depicted in Table 1. ROI-Buffers, of varying lengths, was used to reflect the effect of loci around  
216 the ROI-G. ROI-All\_Others, reflected aggregate variant effects from the remainder of the  
217 genome, given the corresponding size of ROI-G and ROI-Buffer. The significance of each  
218 variance component was assessed using a likelihood ratio test while accounting for age and sex.  
219 Population stratification effects were controlled using strict selection for individuals of European  
220 Ancestry using genomic principal components and multidimensional scaling.<sup>11</sup> Enrichment (E)  
221 values were calculated to determine whether the observed component-heritability estimates were  
222 greater than what would be expected by chance given the observed total genetic variance and the  
223 4.6 million SNPs used in the analysis (i.e., the variance explained we would expect via a random  
224 selection of loci of the same size from the genome). As such, the statistical significance of an  
225 enrichment was evaluated on the basis of whether the expected  $h^2_{SNP}$  fell within the 95%  
226 confidence interval of the observed  $h^2_{SNP}$  (i.e.,  $E > 1.96$ ).

227

$$Expected h^2_{SNP} = \frac{\#SNPs \times Observed h^2_{SNP_{Total}}}{\#SNPs_{Total}}$$

228

229           Meta-analyzed SNP-heritability estimates were obtained by pooling results across folds  
230 and meta-analyzing using a weighted fixed-effect model. Heritability estimates across UKB-  
231 folds were combined using fixed-effects inverse-variance meta-analysis implemented in R using  
232 the “rmeta” package. Mixed linear model association analyses were performed in GCTA and  
233 gene-based testing were done using MAGMA (version 1.06) implemented in FUMA (v.1.3.5e).<sup>23</sup>  
234 Gene-level p-values were used to conduct gene set tests against "Curated Gene Sets" and "GO  
235 terms" pathways identified in Msigdb v5.2.<sup>24</sup> We considered all SNP and gene-based signals  
236 below  $5 \times 10^{-8}$  and  $2.89 \times 10^{-6}$  as genome-wide and gene-wide (i.e., based on 17287 genes tested)  
237 significant, respectively; further, we also implemented a less conservative threshold using a False  
238 Discovery Rate (FDR) of  $q < 0.05$ .<sup>25</sup> All analyses minimized the effects of confounders by  
239 including sex, testing site location, age, and age<sup>2</sup> as covariates.

240

## 241 **RESULTS**

### 242 *Co-expressed Genes in Model Organisms Explain Variation in Human Tobacco Consumption*

243           The estimated total additive genetic effect (i.e., SNP-heritability) of tobacco consumption  
244 ranged from 7.6% to 9.5% across the three folds (see Table 2 reported meta- $h^2_{\text{SNP-Total}}$  values).  
245 Variants across the ROI-genes component of the model (ROI-G) accounted for approximately  
246 0.2-0.4% of the variation in tobacco consumption across folds (see Table 2) while those in the  
247 buffer (ROI-Buffer) and remainder of the genome (ROI-All\_Others) accounted for 0.4-3% and  
248 5-8%, respectively. There was significant enrichment (E) in almost all instances where the  
249 variants in or surrounding the genes of interest were examined (Table 3); no enrichment was  
250 observed in the ROI-All\_Others category.

251           -----*Insert Table 2 here* -----

252           There was limited association between variance explained by ROI-G and buffer length  
253 (model  $R^2$  across folds ranging 0.003-0.09; see Figure 3 panel A). On the contrary, the variance  
254 explained by SNPs in and around the genes of interest (i.e., ROI-Buffer) that were modeled using  
255 buffers of various length (ROI-buffer-#Kb) increased over buffer size (model  $R^2$  across folds  
256 ranging 0.75-0.86; see Figure 3 panel B), whereas the variance explained decreased for ROI-  
257 All\_Others as buffer size increased (model  $R^2$  across folds ranging 0.73-0.81; see Figure 3 panel  
258 C). This result is in line with the observation from previous work that variance explained is  
259 proportional to DNA length<sup>22</sup>, consistent with a polygenic model. Notably, variance explained by  
260 variants located around genes of interest were positively associated with buffer size, but the  
261 enrichment decreased with buffer size (see Figure 4), suggesting that that the trait-associated  
262 variants are more enriched near genes.

263           -----Insert Figure 3 here -----

264           -----Insert Figure 4 here -----

265

### 266 *Genome-wide Association, Gene-based, and Gene set effects*

267           Association analyses using all 139,043 smokers confirmed previously associated regions  
268 identified in a larger meta-analysis that included these data.<sup>6</sup> We identified 594 signals that were  
269 genomewide significant, and a larger set of 938 signals with  $q < 0.05$  (see supplementary Table S3  
270 for complete summary statistics and Supplementary Figures S2 and S3 for the Manhattan and Q-  
271 Q plot, respectively). The top signals resided on chromosomes 15, 19, 8, 7, 4, 3, and 1 (see  
272 Supplementary Figures S4 thru S7 for regional association plots for associations across nicotinic  
273 acetylcholine receptor genes CHRNA4/A5/A6 and CYP2A6, respectively). Most of the  
274 associated SNPs are functionally annotated as intronic, intergenic, and intronic non-coding RNA

275 (see Supplementary Figure S8). Gene-based analyses identified 20 genes that surpassed the  
276 Bonferroni significance threshold and 31 with  $q < 0.05$  (see Supplementary Table S4 and  
277 Supplementary Figures S9 and S10 for the gene-based test Manhattan and Q-Q plots,  
278 respectively). Of the gene-wide significant genes, four were differentially expressed across the  
279 model organism experiments and this overlap was more than we would expect by chance,  $OR =$   
280  $7.20$ , empirical  $p = 4.41E-3$ . Post-hoc examination of the test statistics (i.e., using 10,000  
281 permutations of 500 gene sets from non-GeneWeaver genes) indicated that the majority of the  
282 signals originated from genes largely captured by the *a priori Mus musculus* studies (two sample  
283 t-test:  $t = 2.2813$ ,  $df = 664.87$ , empirical  $p = 0.023$ ; Supplementary Figure S11). Gene set  
284 analyses, which focused on curated gene sets and GO term annotations from MsigDB, identified  
285 745 significant gene sets ( $p < 0.05$ ), but only one gene set, REACTOME: Presynaptic Nicotinic  
286 Acetylcholine Receptors (R-HSA-622323; [https://reactome.org/PathwayBrowser/#/R-HSA-](https://reactome.org/PathwayBrowser/#/R-HSA-622323)  
287 [622323](https://reactome.org/PathwayBrowser/#/R-HSA-622323)) survived multiple-testing correction (Bonferroni-corrected  $p = 2.5 \times 10^{-8}$ ).

288

## 289 **DISCUSSION**

290 We integrated genomic and bioinformatic analyses which provided a rapid approach for  
291 filling the translational space between human and animal genetics research. Similar to other  
292 genetic studies of drug use<sup>26-28</sup>, these findings indicated a neuro-epigenetic component to the  
293 genetic inheritance of tobacco consumption, while also localizing genomic regions of interest.  
294 By using a genetic sample of over 100,000 humans and meta-analyzing across three species from  
295 seven gene expression studies, we found that approximately 4.2%-39.5% of the heritability for  
296 the frequency of human tobacco use can be attributed to mRNA readout related to nicotine  
297 exposure/consumption in the brain. Given that the observed neuro-molecular associations

298 observed with tobacco/nicotine use were inferred via model systems, irrespective of prior GWAS  
299 findings, it stands to reason that integrating knowledge across species will enhance genomic  
300 discoveries related to tobacco use. Importantly, most cross-species findings appeared to be  
301 buried under the conservative genome-wide significant threshold – demonstrating the strength of  
302 our approach, which incorporates significant and non-significant sources of genomic variations *a*  
303 *priori* and helps accommodate the numerous (relevant) genes with small effect sizes riddled  
304 across the human genome. Notably, these observations highlight an interesting perspective of  
305 polygenic effects, in so much as it provides support for a mixture of effects on tobacco  
306 consumption.

307         This study demonstrates the importance of transcriptionally regulated genes and is in  
308 accordance with broad human GWAS research, which detects most of its associations among  
309 intergenic regions.<sup>1</sup> Our results suggest that the genetic proclivity to tobacco use is mediated, in  
310 part, by gene expression in relevant brain regions that relate to specific behavioral mechanisms.  
311 Similarly recent genome-wide research identified genome-wide significant loci in  
312 neurotransmission and reward learning genes for tobacco use and prioritized non-synonymous  
313 protein coding variants.<sup>6</sup> By using just half of the sample size from Liu et al., our findings  
314 corroborated the importance of reward-related and neurotransmission genes and further  
315 disentangle the underlying genetic structure of tobacco consumption by highlighting  
316 transcriptionally relevant cis-eQTLs in hundreds of genomic regions. Overall, our study suggests  
317 that the genetic architecture of tobacco consumption feeds into the neuro-molecular landscape  
318 via modulation of gene expression.

319         These data also suggest that the use of model systems allows for the direct sampling of  
320 brain tissue, in the context of a trait relevant phenotype which models, in a simplified way,

321 characteristics of human disease measured in an organism (e.g., *Mus musculus*, *Drosophila*  
322 *Melanogaster*, *Rattus Norvegicus*, and *Caenorhabditis elegans*, to name a few) with a genome  
323 that has some similarities to humans, including mammals with high percentages of orthologous  
324 genes. It is important to note that when we refer to “modeling” here, we are not referring to the  
325 questionable practice of establishing a single gene perturbation in a model organism as a  
326 “model” of a person with a disease. Rather we are referring to the practice of evaluating the  
327 complex genomic basis of traits that are characteristic of various aspects of the disease state.  
328 Taken alone, model system work has a number of key advantages (over and above access to  
329 brain tissue) including, but not limited to, the use of neurogenetic methods (e.g., optogenetic,  
330 thermogenetic, etc.) which can introduce much larger biological effects in model systems than  
331 could be seen in typical GWAS studies. Additionally, controlled environmental exposures (e.g.,  
332 pharmacological, behavioral, etc.) may be used in model systems in a fashion that would be  
333 impossible in humans. The strengths of model systems allow for smaller-sample studies to be  
334 maximally informative due to larger effect sizes and tighter experimental control, but the  
335 “translatability” of these findings to the human condition has limitations. While some more  
336 basic behavioral traits are convincingly modeled in animals, other complex phenotypes and  
337 disorders are represented only in part by these systems<sup>29</sup>. Furthermore, the phylogenetic  
338 distance between the model organism and *Homo sapiens* can pose additional challenges as only a  
339 subset of genes will be conserved in an informative way; notably, studies have shown  
340 conservation of epigenetic marks across mice and humans.<sup>30</sup> Attempts to leverage conserved  
341 evidence across mice and humans in alcohol dependence research have revealed networks of  
342 genes and loci, which had gone undetected in prior GWAS.<sup>31</sup> In sum, model systems bring

343 unique advantages and disadvantages to behavior genetics that may complement human GWAS  
344 studies of related traits.

345         These analyses identified various genes previously linked to nicotine consumption and  
346 cessation, including validated nicotinic acetylcholine receptor genes *CHRNA3/A4/A5/B4*, as well  
347 as nicotine metabolism genes (*CYP2A6/A7*), which provides a sanity-check for our genome-wide  
348 analyses. Mechanistic research in mice suggests that a mutation of the *CHRNA5* gene and  
349 concomitant habenular expression of *CHRNA5* robustly increases nicotine consumption, but not  
350 after experimentally restoring habenular *CHRNA5* levels back to normal<sup>32</sup>. These results buttress  
351 our findings delineating the path from genetic predisposition to gene expression and eventually  
352 specific behavioral outcomes and may suggest a gene x drug interaction. That is, those at higher  
353 genetic risk for tobacco use may have an altered physiological response that increases  
354 susceptibility for augmented consumption.<sup>33;34</sup> Apart from the established nicotinic acetylcholine  
355 receptors, we also discovered significant genetic association of chromosome 19 genes: *RAB4B*,  
356 *EGLN2* and *CYP2A6* with tobacco consumption. *RAB4B* is involved in the breakdown of GTP  
357 for vesicular transport<sup>35</sup> and was previously associated with PFC gene expression among those  
358 with major depression.<sup>36</sup> While *RAB4B*, *EGLN2* and *CYP2A6* are in strong linkage  
359 disequilibrium, research suggests they correspond to largely independent mechanisms.<sup>37</sup> Our  
360 study suggests that *RAB4B* is driven by a brain-dependent mechanism (identified in mice)<sup>38</sup> and  
361 might underlie neuroplasticity processes related to nicotine reward<sup>39</sup>. On the other hand, *EGLN2*  
362 and *CYP2A6* were not associated with gene expression findings in animal models of nicotine  
363 use/exposure. *EGLN2* is a hypoxia inducible factor and plays a role in oxygen homeostasis<sup>40</sup> and  
364 may be uniquely associated with humans because the vehicle for nicotine intake is via oxygen  
365 restricting smoke (i.e., carbon monoxide present in cigarette smoke preferentially binds to



366 hemoglobin and thus reduces its ability to transport oxygen), whereas animal models typically  
367 study nicotine through injections or implementation in the drinking water. *CYP2A6* is an enzyme  
368 that accounts for ~80% of nicotine clearance<sup>41</sup> and is almost exclusively expressed in the liver,  
369 which is a likely reason that it was not included in our brain-mediated cross-species gene list.  
370 Therefore, our integrative approach better contextualizes the effects of genes associated with  
371 human complex traits and better determines how specific genetic associations relate to relevant  
372 model systems in particular tissues.

373         While novel, there are several considerations for interpreting the current findings. First,  
374 these analyses are limited by current understanding of the consequences of tobacco exposure  
375 using only microarray studies. We sought to overcome this limitation by integrating multiple  
376 sources of information using differences across brain and model organisms, but future studies are  
377 needed to determine whether these effects are invariant, as well as whether the experimental  
378 paradigm itself may alter this line of evidence, especially as the volume of literature increases.  
379 Second, our analyses did not examine genes that have been shown to be differentially methylated  
380 by tobacco exposure; we assumed that such processes would equate to direct differences in  
381 mRNA levels, constructed gene list utilized animal research, which focused primarily on  
382 orthologous genes.<sup>42; 43</sup> As such, there was less emphasis on regulatory elements for said genes,  
383 which may also generalize across species. We attempted to capture said effects by using buffers  
384 of various lengths to approximate the relative import of *cis* and possibly *trans* acting effects. It  
385 should be noted however, that our results are in line with the *multiple enhancer variant*  
386 *hypothesis*, which purports a similar role of noncoding variants in common traits.<sup>44</sup>

387         Future research is warranted to determine whether our integrative framework generalizes  
388 across complex human traits. Traits with different genetic architectures, epigenetic landscapes

389 and animal models may yield disparate findings. We found that the bulk of our cross-species  
390 signal stemmed from mouse models of nicotine use, but it will be important for future research to  
391 be conducted across multiple smoking phenotypes and include additional species/studies and  
392 incorporate findings from human tissues to benchmark findings with other model organisms.  
393 Ideally, integrative genomics comparisons would leverage equitable and minimally error prone  
394 outcomes or endophenotypes across studies. Given the array of animal models for human traits,  
395 an inviting avenue of research should clarify the utility of specific tissues, cell types and animal  
396 models in human genetics. With a large enough literature base, we may be able to better refine  
397 what tissues and specific mechanisms human genomic signals stem from and ultimately may  
398 better characterize the genetic make-up for complex traits. Future studies leveraging these  
399 approaches should consider strategies for reducing buffer size and examining heterogeneity  
400 across tissue/cell types, as well as whether the observed effects generalize across human  
401 populations (e.g., European, African, Asian, etc).

402

### 403 *Conclusions*

404 In sum, this study represents a step forward for interspecies behavioral genetics and  
405 provides a proof of principle for bridging the gap between human and animal genetics in  
406 identifying polygenic risk variants. We show that enhancing human GWAS by incorporating *a*  
407 *priori* information on relevant traits (even across species) is a worthwhile path to unraveling the  
408 genetic basis for complex traits.

409 **REFERENCES**

- 410 1. Maurano, M.T., Humbert, R., Rynes, E., Thurman, R.E., Haugen, E., Wang, H., Reynolds, A.P.,  
411 Sandstrom, R., Qu, H., Brody, J., et al. (2012). Systematic localization of common disease-  
412 associated variation in regulatory DNA. *Science (New York, NY)* 337, 1190-1195.
- 413 2. Wu, Y., Zeng, J., Zhang, F., Zhu, Z., Qi, T., Zheng, Z., Lloyd-Jones, L.R., Marioni, R.E., Martin, N.G.,  
414 Montgomery, G.W., et al. (2018). Integrative analysis of omics summary data reveals putative  
415 mechanisms underlying complex traits. *Nat Commun* 9, 918.
- 416 3. Changeux, J.-P., Edelstein, S., and Edelstein, S.J. (2005). Nicotinic acetylcholine receptors: from  
417 molecular biology to cognition. (Odile Jacob Publishing Corp).
- 418 4. Besson, M., Granon, S., Mameli-Engvall, M., Cloëz-Tayarani, I., Maubourguet, N., Cormier, A., Cazala,  
419 P., David, V., Changeux, J.-P., and Faure, P. (2007). Long-term effects of chronic nicotine  
420 exposure on brain nicotinic receptors. *Proceedings of the National Academy of Sciences* 104,  
421 8155-8160.
- 422 5. Grenhoff, J., Aston-Jones, G., and Svensson, T.H. (1986). Nicotinic effects on the firing pattern of  
423 midbrain dopamine neurons. *Acta Physiol Scand* 128, 351-358.
- 424 6. Liu, M., Jiang, Y., Wedow, R., Li, Y., Brazel, D.M., Chen, F., Datta, G., Davila-Velderrain, J., McGuire, D.,  
425 Tian, C., et al. (2019). Association studies of up to 1.2 million individuals yield new insights into  
426 the genetic etiology of tobacco and alcohol use. *Nat Genet* 51, 237-244.
- 427 7. Li, C., Li, M., Lange, E.M., and Watanabe, R.M. (2008). Prioritized subset analysis: improving power in  
428 genome-wide association studies. *Hum Hered* 65, 129-141.
- 429 8. Yang, J., Benyamin, B., McEvoy, B.P., Gordon, S., Henders, A.K., Nyholt, D.R., Madden, P.A., Heath,  
430 A.C., Martin, N.G., Montgomery, G.W., et al. (2010). Common SNPs explain a large proportion of  
431 the heritability for human height. *Nat Genet* 42, 565-569.
- 432 9. Yang, J., Lee, S.H., Goddard, M.E., and Visscher, P.M. (2011). GCTA: a tool for genome-wide complex  
433 trait analysis. *American journal of human genetics* 88, 76-82.
- 434 10. Yang, J., Lee, S.H., Wray, N.R., Goddard, M.E., and Visscher, P.M. (2016). GCTA-GREML accounts for  
435 linkage disequilibrium when estimating genetic variance from genome-wide SNPs. *Proceedings*  
436 *of the National Academy of Sciences of the United States of America* 113, E4579-4580.
- 437 11. Brick, L.A., Micalizzi, L., Knopik, V.S., and Palmer, R.H.C. (2019). Characterization of DSM-IV Opioid  
438 Dependence Among Individuals of European Ancestry. *J Stud Alcohol Drugs* 80, 319-330.
- 439 12. Brazel, D.M., Jiang, Y., Hughey, J.M., Turcot, V., Zhan, X., Gong, J., Batini, C., Weissenkampen, J.D.,  
440 Liu, M., Consortium, C.H.D.E., et al. (2019). Exome Chip Meta-analysis Fine Maps Causal Variants  
441 and Elucidates the Genetic Architecture of Rare Coding Variants in Smoking and Alcohol Use.  
442 *Biol Psychiatry* 85, 946-955.
- 443 13. Baker, E.J., Jay, J.J., Bubier, J.A., Langston, M.A., and Chesler, E.J. (2012). GeneWeaver: a web-based  
444 system for integrative functional genomics. *Nucleic acids research* 40, D1067-1076.
- 445 14. Baker, E., Bubier, J.A., Reynolds, T., Langston, M.A., and Chesler, E.J. (2016). GeneWeaver: data  
446 driven alignment of cross-species genomics in biology and disease. *Nucleic acids research* 44,  
447 D555-559.
- 448 15. Baker, E.J., Jay, J.J., Philip, V.M., Zhang, Y., Li, Z., Kirova, R., Langston, M.A., and Chesler, E.J. (2009).  
449 Ontological Discovery Environment: a system for integrating gene-phenotype associations.  
450 *Genomics* 94, 377-387.
- 451 16. Genomes Project, C., Auton, A., Brooks, L.D., Durbin, R.M., Garrison, E.P., Kang, H.M., Korbel, J.O.,  
452 Marchini, J.L., McCarthy, S., McVean, G.A., et al. (2015). A global reference for human genetic  
453 variation. *Nature* 526, 68-74.

- 454 17. Brick, L.A., Keller, M.C., Knopik, V.S., McGeary, J.E., and Palmer, R.H.C. (2019). Shared additive  
455 genetic variation for alcohol dependence among subjects of African and European ancestry.  
456 *Addiction biology* 24, 132-144.
- 457 18. Visscher, P.M., Hemani, G., Vinkhuyzen, A.A., Chen, G.B., Lee, S.H., Wray, N.R., Goddard, M.E., and  
458 Yang, J. (2014). Statistical power to detect genetic (co)variance of complex traits using SNP data  
459 in unrelated samples. *PLoS Genet* 10, e1004269.
- 460 19. Chang, C.C., Chow, C.C., Tellier, L.C., Vattikuti, S., Purcell, S.M., and Lee, J.J. (2015). Second-  
461 generation PLINK: rising to the challenge of larger and richer datasets. *Gigascience* 4, 7.
- 462 20. Vandiedonck, C. (2018). Genetic association of molecular traits: A help to identify causative variants  
463 in complex diseases. *Clin Genet* 93, 520-532.
- 464 21. Yang, J., Lee, S.H., Goddard, M.E., and Visscher, P.M. (2011). GCTA: a tool for genome-wide complex  
465 trait analysis. *American journal of human genetics* 88, 76-82.
- 466 22. Yang, J., Manolio, T.A., Pasquale, L.R., Boerwinkle, E., Caporaso, N., Cunningham, J.M., de Andrade,  
467 M., Feenstra, B., Feingold, E., Hayes, M.G., et al. (2011). Genome partitioning of genetic  
468 variation for complex traits using common SNPs. *Nat Genet* 43, 519-525.
- 469 23. Watanabe, K., Taskesen, E., van Bochoven, A., and Posthuma, D. (2017). Functional mapping and  
470 annotation of genetic associations with FUMA. *Nat Commun* 8, 1826.
- 471 24. Subramanian, A., Tamayo, P., Mootha, V.K., Mukherjee, S., Ebert, B.L., Gillette, M.A., Paulovich, A.,  
472 Pomeroy, S.L., Golub, T.R., Lander, E.S., et al. (2005). Gene set enrichment analysis: a  
473 knowledge-based approach for interpreting genome-wide expression profiles. *Proceedings of  
474 the National Academy of Sciences of the United States of America* 102, 15545-15550.
- 475 25. Benjamini Y., H.Y. (1995). Controlling the false discovery rate—a practical and powerful approach to  
476 multiple testing. *J R Stat Soc Ser B* 57, 289–300.
- 477 26. Evangelou, E., Gao, H., Chu, C., Ntritsos, G., Blakeley, P., Butts, A.R., Pazoki, R., Suzuki, H., Koskeridis,  
478 F., Yiorkas, A.M., et al. (2019). New alcohol-related genes suggest shared genetic mechanisms  
479 with neuropsychiatric disorders. *Nature Human Behaviour* 3, 950-961.
- 480 27. Gelernter, J., Sun, N., Polimanti, R., Pietrzak, R.H., Levey, D.F., Lu, Q., Hu, Y., Li, B., Radhakrishnan, K.,  
481 Aslan, M., et al. (2019). Genome-wide Association Study of Maximum Habitual Alcohol Intake in  
482 >140,000 U.S. European and African American Veterans Yields Novel Risk Loci. *Biological  
483 psychiatry* 86, 365-376.
- 484 28. Kranzler, H.R., Zhou, H., Kember, R.L., Vickers Smith, R., Justice, A.C., Damrauer, S., Tsao, P.S., Klarin,  
485 D., Baras, A., Reid, J., et al. (2019). Genome-wide association study of alcohol consumption and  
486 use disorder in 274,424 individuals from multiple populations. *Nature Communications* 10,  
487 1499.
- 488 29. Farris, S.P., Riley, B.P., Williams, R.W., Mulligan, M.K., Miles, M.F., Lopez, M.F., Hitzemann, R., Iancu,  
489 O.D., Colville, A., Walter, N.A.R., et al. (2018). Cross-species molecular dissection across alcohol  
490 behavioral domains. *Alcohol* 72, 19-31.
- 491 30. Dowell, R.D. (2011). The similarity of gene expression between human and mouse tissues. *Genome  
492 Biol* 12, 101.
- 493 31. Mignogna, K.M., Bacanu, S.A., Riley, B.P., Wolen, A.R., and Miles, M.F. (2019). Cross-species alcohol  
494 dependence-associated gene networks: Co-analysis of mouse brain gene expression and human  
495 genome-wide association data. *PloS one* 14, e0202063.
- 496 32. Fowler, C.D., Lu, Q., Johnson, P.M., Marks, M.J., and Kenny, P.J. (2011). Habenular  $\alpha 5$  nicotinic  
497 receptor subunit signalling controls nicotine intake. *Nature* 471, 597-601.
- 498 33. Bierut, L.J., Stitzel, J.A., Wang, J.C., Hinrichs, A.L., Gruzca, R.A., Xuei, X., Saccone, N.L., Saccone, S.F.,  
499 Bertelsen, S., Fox, L., et al. (2008). Variants in nicotinic receptors and risk for nicotine  
500 dependence. *Am J Psychiatry* 165, 1163-1171.

- 501 34. Sharp, B.M., and Chen, H. (2019). Neurogenetic determinants and mechanisms of addiction to  
502 nicotine and smoked tobacco. *European Journal of Neuroscience* 50, 2164-2179.
- 503 35. He, H., Dai, F., Yu, L., She, X., Zhao, Y., Jiang, J., Chen, X., and Zhao, S. (2002). Identification and  
504 characterization of nine novel human small GTPases showing variable expressions in liver cancer  
505 tissues. *Gene Expr* 10, 231-242.
- 506 36. Kang, H.J., Voleti, B., Hajszan, T., Rajkowska, G., Stockmeier, C.A., Licznanski, P., Lepack, A., Majik,  
507 M.S., Jeong, L.S., Banasr, M., et al. (2012). Decreased expression of synapse-related genes and  
508 loss of synapses in major depressive disorder. *Nat Med* 18, 1413-1417.
- 509 37. Bloom, A.J., Baker, T.B., Chen, L.-S., Breslau, N., Hatsukami, D., Bierut, L.J., and Goate, A. (2014).  
510 Variants in two adjacent genes, EGLN2 and CYP2A6, influence smoking behavior related to  
511 disease risk via different mechanisms. *Human molecular genetics* 23, 555-561.
- 512 38. Wang, J., Gutala, R., Hwang, Y.Y., Kim, J.M., Konu, O., Ma, J.Z., and Li, M.D. (2008). Strain- and region-  
513 specific gene expression profiles in mouse brain in response to chronic nicotine treatment.  
514 *Genes, Brain and Behavior* 7, 78-87.
- 515 39. King, J.R., and Kabbani, N. (2016). Alpha 7 nicotinic receptor coupling to heterotrimeric G proteins  
516 modulates RhoA activation, cytoskeletal motility, and structural growth. *Journal of*  
517 *Neurochemistry* 138, 532-545.
- 518 40. Erez, N., Stambolsky, P., Shats, I., Milyavsky, M., Kachko, T., and Rotter, V. (2004). Hypoxia-  
519 dependent regulation of PHD1: cloning and characterization of the human PHD1/EGLN2 gene  
520 promoter. *FEBS Letters* 567, 311-315.
- 521 41. Hukkanen, J., Jacob, P., and Benowitz, N.L. (2005). Metabolism and Disposition Kinetics of Nicotine.  
522 *Pharmacological Reviews* 57, 79.
- 523 42. Lee, K.W., and Pausova, Z. (2013). Cigarette smoking and DNA methylation. *Front Genet* 4, 132.
- 524 43. Tsai, P.C., Glastonbury, C.A., Eliot, M.N., Bollepalli, S., Yet, I., Castillo-Fernandez, J.E., Carnero-  
525 Montoro, E., Hardiman, T., Martin, T.C., Vickers, A., et al. (2018). Smoking induces coordinated  
526 DNA methylation and gene expression changes in adipose tissue with consequences for  
527 metabolic health. *Clin Epigenetics* 10, 126.
- 528 44. Corradin, O., Saiakhova, A., Akhtar-Zaidi, B., Myeroff, L., Willis, J., Cowper-Sal lari, R., Lupien, M.,  
529 Markowitz, S., and Scacheri, P.C. (2014). Combinatorial effects of multiple enhancer variants in  
530 linkage disequilibrium dictate levels of gene expression to confer susceptibility to common  
531 traits. *Genome Res* 24, 1-13.
- 532 45. Chen, X., Williamson, V.S., An, S.S., Hetteima, J.M., Aggen, S.H., Neale, M.C., and Kendler, K.S. (2008).  
533 Cannabinoid receptor 1 gene association with nicotine dependence. *Archives of general*  
534 *psychiatry* 65, 816-824.
- 535 46. Poleskaya, O.O., Fryxell, K.J., Merchant, A.D., Locklear, L.L., Ker, K.-F., McDonald, C.G., Eppolito,  
536 A.K., Smith, L.N., Wheeler, T.L., and Smith, R.F. (2007). Nicotine causes age-dependent changes  
537 in gene expression in the adolescent female rat brain. *Neurotoxicology and Teratology* 29, 126-  
538 140.
- 539 47. Kily, L.J.M., Cowe, Y.C.M., Hussain, O., Patel, S., McElwaine, S., Cotter, F.E., and Brennan, C.H. (2008).  
540 Gene expression changes in a zebrafish model of drug dependency suggest conservation of  
541 neuro-adaptation pathways. *Journal of Experimental Biology* 211, 1623.

542

543

544 **Declarations of Interests**

545 The authors declare no competing interests

546

547 **Acknowledgements**

548 We acknowledge the National Institute on Drug Abuse award DP1DA042103 (to RHCP) and the  
549 National Institute on Alcohol Abuse and Alcohol (R01AA018776) (to EJC). We acknowledge  
550 the Wellcome Trust medical charity, Medical Research Council, Department of Health, Scottish  
551 Government, Northwest Regional Development Agency, Welsh Government, British Heart  
552 Foundation, Cancer Research UK and Diabetes UK, and the National Health Service (NHS) for  
553 their part in supporting the UK Biobank without which this study would not have been possible.  
554 The contents of this paper do not represent the views of the U.S. Department of Veterans Affairs  
555 or the United States Government.

556

557 **Data Accessibility Information**

558 The genetic and phenotype datasets from UK Biobank that were analyzed here are available via  
559 the UK Biobank data access process (see <http://www.ukbiobank.ac.uk/register-apply/>). Detailed  
560 information about the genetic data available from UK Biobank is available at  
561 <http://www.ukbiobank.ac.uk/scientists-3/genetic-data/> and  
562 <http://biobank.ctsu.ox.ac.uk/crystal/label.cgi?id=100314>. Note that the exact number of samples  
563 with genetic data currently available in UK Biobank may differ slightly from those described in  
564 this paper as it is subject to the data use agreement at the time of each study.

565

566  
567  
568  
569  
570  
571  
572  
573  
574  
575  
576  
577  
578  
579  
580  
581  
582  
583  
584  
585  
586  
587  
588  
589  
590  
591  
592  
593  
594

### Figure Citations

**Figure 1.** Theoretical integrative genomics approach to characterizing genetic underpinnings of nicotine consumption using model organisms.

**Figure 2.** Visualization of each model-component utilized within statistical analyses.

**Figure 3.** Plots of the relationship between buffer length and percent genetic variance explained by each model component. Citation: Lines shown reflect inferred trends for buffer lengths not assessed. Panel A shows the percent genetic variance explained by the gene region model component. Observed relationships between length and variance explained are reflected by the regression equation and model fit (r-squared;  $R^2$ ) by the following equations for Fold 1:  $-0.002(\text{Buffer length}) + 0.0355$  [model  $R^2=0.0869$ ]; Fold 2:  $-4E-05(\text{Buffer length}) + 0.0231$  [model  $R^2=0.0034$ ]; Fold 3:  $-8E-05(\text{Buffer length}) + 0.0428$  [model  $R^2=0.0869$ ]. Panel B shows the percent genetic variance explained by the buffer region model component. For this component, the observed relationships between length and variance explained are reflected by the regression equation and model fit (r-squared) by the following equations for Fold 1:  $0.007(\text{Buffer length}) - 0.001$  [model  $R^2=0.858$ ]; Fold 2:  $0.006(\text{Buffer length}) + 0.008$  [model  $R^2=0.754$ ]; Fold 3:  $0.005(\text{Buffer length}) + 0.004$  [model  $R^2=0.86$ ]. Lastly, Panel C describes the percent genetic variance explained by the “all-other variants” model component. The observed relationships between length and variance explained for panel C are reflected by the regression equation and model fit (r-squared) by the following equations for Fold 1:  $-0.007(\text{Buffer length}) + 0.966$  [model  $R^2=0.809$ ]; Fold 2:  $-0.006(\text{Buffer length}) + 0.969$  [model  $R^2=0.729$ ]; Fold 3:  $-0.005(\text{Buffer length}) + 0.953$  [model  $R^2=0.812$ ].

**Figure 4.** Scatterplot illustrating change in enrichment (E) of the set of ROI-buffer variants as a function of models of with varied buffer size. Abbreviations F1, F2, and F3, correspond to folds 1, 2, and 3, respectively.

**Table 1. Identified GeneWeaver Gene Sets Related to Tobacco/Nicotine Exposure**

| Author(s)                       | GeneWeaver ID                                        | Model Organism           | Nicotine Consumption/Exposure Paradigm                                                                   | Experimental Design                                      | Brain Region                     | Number of Genes Contributed |
|---------------------------------|------------------------------------------------------|--------------------------|----------------------------------------------------------------------------------------------------------|----------------------------------------------------------|----------------------------------|-----------------------------|
| Chen et al. <sup>45</sup>       | GS87128                                              | <i>Mus musculus</i>      | Subcutaneous acute nicotine treatment (expression changes measured at time-points of 1, 2, 4, and 6 hrs) | Microarray Analysis, WGCNA                               | VTA                              | 184                         |
| Polesskaya et al. <sup>46</sup> | GS14885                                              | <i>Rattus norvegicus</i> | Subcutaneous chronic nicotine treatment (at ages p25, p35, p45, and p55)                                 | Microarray Analysis, qRT-PCR, Principle Cluster Analysis | PFC, Ventral Striatum, Hippo.    | 66                          |
| Wang et al. <sup>38</sup>       | GS14888, GS14889, GS14890, GS14891, GS14892, GS14893 | <i>Mus musculus</i>      | Nicotine administration in drinking water in two selectively bred mouse strains                          | Microarray Analysis, qRT-PCR, WGCNA                      | Amygdala, Hippo., nAcc, PFC, VTA | 651                         |
| Kily et al. <sup>47</sup>       | GS14902, GS14903                                     | <i>Danio rerio</i>       | Nicotine-induced conditioned place preference                                                            | Microarray Analysis, qRT-PCR                             | Whole Brain                      | 158                         |
| Sharp et al. <sup>34</sup>      | GS128167                                             | <i>Rattus norvegicus</i> | Chronic nicotine self-administration                                                                     | Microarray Analysis, RT-PCR                              | nAcc                             | 188                         |

Table showing identified publications and GeneWeaver gene sets. Note: Gene set IDs can be used to review the full complement of genes supplied by each study.



Table 2. Estimated SNP-heritability for each component of the ROI model.

| <i>Model component</i>                 | <i>F1</i> $h^2_{SNP}$  | <i>F1</i> SE | <i>F2</i> $h^2_{SNP}$  | <i>F2</i> SE | <i>F3</i> $h^2_{SNP}$    | <i>F3</i> SE | $h^2_{meta}$ (95% CI)       | % total $h^2_{meta}$ |
|----------------------------------------|------------------------|--------------|------------------------|--------------|--------------------------|--------------|-----------------------------|----------------------|
| <i>ROI - Genes</i>                     |                        |              |                        |              |                          |              |                             |                      |
| Gene (0kb buffer model)                | 3.820E-03 <sup>b</sup> | 1.64E-03     | 3.296E-03 <sup>a</sup> | 1.63E-03     | 5.459E-03 <sup>aaa</sup> | 1.79E-03     | 4.11E-3 [2.20E-3,6.00E-3]   | 4.96%                |
| Gene (5kb buffer model)                | 2.865E-03 <sup>a</sup> | 1.68E-03     | 1.540E-03              | 1.62E-03     | 4.184E-03 <sup>aa</sup>  | 1.86E-03     | 2.74E-3 [0.80E-3,4.70E-3]   | 3.26%                |
| Gene (10kb buffer model)               | 1.720E-03              | 1.60E-03     | 8.890E-04              | 1.56E-03     | 2.933E-03 <sup>a</sup>   | 1.78E-03     | 1.76E-3 [-0.10E-3,3.60E-3]  | 2.16%                |
| Gene (25kb buffer model)               | 1.260E-03              | 1.57E-03     | 1.070E-03              | 1.58E-03     | 2.773E-03 <sup>a</sup>   | 1.76E-03     | 1.60E-3 [-0.20E-3,3.50E-3]  | 1.92%                |
| Gene (35kb buffer model)               | 1.340E-03              | 1.58E-03     | 1.310E-03              | 1.60E-03     | 2.995E-03 <sup>a</sup>   | 1.77E-03     | 1.81E-3 [<-0.01E-3,3.70E-3] | 2.16%                |
| Gene (50kb buffer model)               | 3.117E-03 <sup>a</sup> | 1.61E-03     | 2.600E-03 <sup>a</sup> | 1.59E-03     | 4.947E-03 <sup>aa</sup>  | 1.78E-03     | 3.50E-3 [1.60E-3,5.30E-3]   | 4.17%                |
| <i>ROI - Buffer</i>                    |                        |              |                        |              |                          |              |                             |                      |
| Buffer 0kb                             | N/A                    | N/A          | N/A                    | N/A          | N/A                      | N/A          | N/A                         | N/A                  |
| Buffer 5kb                             | 3.253E-03 <sup>a</sup> | 1.78E-03     | 5.822E-03 <sup>c</sup> | 1.88E-03     | 3.431E-03 <sup>a</sup>   | 1.86E-03     | 4.13E-3 [2.00E-3,6.20E-3]   | 4.95%                |
| Buffer 10kb                            | 7.880E-03 <sup>c</sup> | 2.08E-03     | 8.964E-03 <sup>c</sup> | 2.10E-03     | 7.717E-03 <sup>c</sup>   | 2.13E-03     | 8.19E-3 [5.80E-3,1.06E-2]   | 9.84%                |
| Buffer 25kb                            | 1.101E-02 <sup>c</sup> | 2.35E-03     | 9.625E-03 <sup>c</sup> | 2.27E-03     | 1.016E-02 <sup>c</sup>   | 2.39E-03     | 1.02E-2 [7.60E-3,1.29E-2]   | 12.36%               |
| Buffer 35kb                            | 1.135E-02 <sup>c</sup> | 2.44E-03     | 9.542E-03 <sup>c</sup> | 2.35E-03     | 1.048E-02 <sup>c</sup>   | 2.48E-03     | 1.04E-2 [7.70E-3,1.32E-2]   | 12.50%               |
| Buffer 50kb                            | 3.141E-02 <sup>c</sup> | 5.29E-03     | 3.303E-02 <sup>c</sup> | 5.28E-03     | 2.743E-02 <sup>c</sup>   | 5.32E-03     | 3.06E-2 [2.46E-2,3.66E-2]   | 36.47%               |
| <i>ROI - Other genomewide variants</i> |                        |              |                        |              |                          |              |                             |                      |
| All Other Variants (0kb buffer model)  | 7.145E-02 <sup>b</sup> | 7.82E-03     | 7.586E-02 <sup>c</sup> | 7.76E-03     | 8.853E-02 <sup>c</sup>   | 8.04E-03     | 7.84E-2 [6.95E-2,8.73E-2]   | 94.92%               |
| All Other Variants (5kb buffer model)  | 6.923E-02 <sup>c</sup> | 7.85E-03     | 7.235E-02 <sup>c</sup> | 7.76E-03     | 8.658E-02 <sup>c</sup>   | 8.06E-03     | 7.58E-2 [6.69E-2,8.48E-2]   | 91.44%               |
| All Other Variants (10kb buffer model) | 6.607E-02 <sup>c</sup> | 7.80E-03     | 7.042E-02 <sup>c</sup> | 7.73E-03     | 8.408E-02 <sup>c</sup>   | 8.03E-03     | 7.33E-2 [6.44E-2,8.22E-2]   | 88.00%               |
| All Other Variants (25kb buffer model) | 6.359E-02 <sup>c</sup> | 7.75E-03     | 6.933E-02 <sup>c</sup> | 7.70E-03     | 8.184E-02 <sup>c</sup>   | 7.99E-03     | 7.14E-2 [6.25E-2,8.02E-2]   | 85.71%               |
| All Other Variants (35kb buffer model) | 6.319E-02 <sup>c</sup> | 7.73E-03     | 6.898E-02 <sup>c</sup> | 7.68E-03     | 8.105E-02 <sup>c</sup>   | 7.97E-03     | 7.09E-2 [6.20E-2,7.97E-2]   | 85.22%               |
| All Other Variants (50kb buffer model) | 4.216E-02 <sup>c</sup> | 7.40E-03     | 4.524E-02 <sup>c</sup> | 7.34E-03     | 6.242E-02 <sup>c</sup>   | 7.72E-03     | 4.96E-2 [4.11E-2,5.80E-2]   | 59.12%               |
| <i>Total</i>                           |                        |              |                        |              |                          |              |                             |                      |
| Total heritability (0kb buffer model)  | 7.530E-02              | 7.86E-03     | 7.920E-02              | 7.79E-03     | 9.400E-02                | 8.08E-03     | 8.26E-2 [7.36E-2,9.15E-2]   | N/A                  |

|                                        |           |          |           |          |           |          |                           |     |
|----------------------------------------|-----------|----------|-----------|----------|-----------|----------|---------------------------|-----|
| Total heritability (5kb buffer model)  | 7.530E-02 | 7.85E-03 | 7.970E-02 | 7.78E-03 | 9.420E-02 | 8.08E-03 | 8.29E-2 [7.39E-2,9.18E-2] | N/A |
| Total heritability (10kb buffer model) | 7.570E-02 | 7.84E-03 | 8.030E-02 | 7.78E-03 | 9.470E-02 | 8.07E-03 | 8.33E-2 [7.44E-2,9.23E-2] | N/A |
| Total heritability (25kb buffer model) | 7.590E-02 | 7.84E-03 | 8.000E-02 | 7.77E-03 | 9.480E-02 | 8.07E-03 | 8.33E-2 [7.44E-2,9.22E-2] | N/A |
| Total heritability (35kb buffer model) | 7.590E-02 | 7.84E-03 | 7.980E-02 | 7.78E-03 | 9.450E-02 | 8.07E-03 | 8.32E-2 [7.43E-2,9.21E-2] | N/A |
| Total heritability (50kb buffer model) | 7.670E-02 | 7.85E-03 | 8.090E-02 | 7.79E-03 | 9.480E-02 | 8.09E-03 | 8.39E-2 [7.49E-2,9.28E-2] | N/A |

Table shows the estimated heritability for each fold and the meta-heritability estimated across folds. Note that components are labelled according to the observed effects used across the models with varied buffer lengths. Consequently, there are no effects for the 0Kb buffer length model. Abbreviations: F1-F3 indicate analysis folds 1 thru 3, N/A - not applicable, SE - standard error. Notations: <sup>a</sup> -  $p < 0.05$ , <sup>b</sup>  $p < 0.01$ , <sup>c</sup>  $p < 0.001$  (van Dam et al., 2019)

595  
596

Table 3: Calculated Enrichment Values for Each Component of the ROI Model

| Model component                        | Number of SNPs | Fold 1               |          |                      |                    | Fold 2               |          |                      |                    | Fold 3               |          |                      |                    |
|----------------------------------------|----------------|----------------------|----------|----------------------|--------------------|----------------------|----------|----------------------|--------------------|----------------------|----------|----------------------|--------------------|
|                                        |                | Observed $h^2_{SNP}$ | SE       | Expected $h^2_{SNP}$ | Enrichment         | Observed $h^2_{SNP}$ | SE       | Expected $h^2_{SNP}$ | Enrichment         | Observed $h^2_{SNP}$ | SE       | Expected $h^2_{SNP}$ | Enrichment         |
| <i>ROI - Genes</i>                     |                |                      |          |                      |                    |                      |          |                      |                    |                      |          |                      |                    |
| Gene (0kb buffer model)                | 81453          | 3.82E-03             | 1.64E-03 | 1.32E-03             | 2.90 <sup>c</sup>  | 3.30E-03             | 1.63E-03 | 1.38E-03             | 2.38 <sup>c</sup>  | 5.46E-03             | 1.79E-03 | 1.64E-03             | 3.32 <sup>c</sup>  |
| Gene (5kb buffer model)                | 81453          | 2.20E-03             | 1.65E-03 | 1.36E-03             | 1.62 <sup>c</sup>  | 1.54E-03             | 1.62E-03 | 1.39E-03             | 1.11               | 4.18E-03             | 1.86E-03 | 1.65E-03             | 2.54 <sup>c</sup>  |
| Gene (10kb buffer model)               | 81453          | 1.85E-03             | 1.65E-03 | 1.45E-03             | 1.27               | 8.89E-04             | 1.56E-03 | 1.40E-03             | 0.63 <sup>c</sup>  | 2.93E-03             | 1.78E-03 | 1.66E-03             | 1.77 <sup>c</sup>  |
| Gene (25kb buffer model)               | 81453          | 1.16E-03             | 1.58E-03 | 1.36E-03             | 0.85               | 1.07E-03             | 1.58E-03 | 1.40E-03             | 0.76               | 2.77E-03             | 1.76E-03 | 1.66E-03             | 1.67 <sup>c</sup>  |
| Gene (35kb buffer model)               | 81453          | 1.33E-03             | 1.59E-03 | 1.36E-03             | 0.97               | 1.31E-03             | 1.60E-03 | 1.40E-03             | 0.94               | 3.00E-03             | 1.77E-03 | 1.65E-03             | 1.81 <sup>c</sup>  |
| Gene (50kb buffer model)               | 81453          | 2.86E-03             | 1.60E-03 | 1.45E-03             | 1.97 <sup>c</sup>  | 2.60E-03             | 1.59E-03 | 1.41E-03             | 1.84 <sup>c</sup>  | 4.95E-03             | 1.78E-03 | 1.66E-03             | 2.98 <sup>c</sup>  |
| <i>ROI - Buffer</i>                    |                |                      |          |                      |                    |                      |          |                      |                    |                      |          |                      |                    |
| Buffer 0kb                             | N/A            | N/A                  | N/A      | N/A                  | N/A                | N/A                  | N/A      | N/A                  | N/A                | N/A                  | N/A      | N/A                  | N/A                |
| Buffer 5kb                             | 10815          | 4.54E-03             | 1.83E-03 | 1.80E-04             | 25.20 <sup>c</sup> | 5.82E-03             | 1.88E-03 | 1.85E-04             | 31.45 <sup>c</sup> | 3.43E-03             | 1.86E-03 | 2.19E-04             | 15.68 <sup>c</sup> |
| Buffer 10kb                            | 21288          | 8.19E-03             | 2.10E-03 | 3.80E-04             | 21.56 <sup>c</sup> | 8.96E-03             | 2.10E-03 | 3.67E-04             | 24.43 <sup>c</sup> | 7.72E-03             | 2.13E-03 | 4.33E-04             | 17.82 <sup>c</sup> |
| Buffer 25kb                            | 53341          | 1.03E-02             | 2.31E-03 | 8.93E-04             | 11.56 <sup>c</sup> | 9.63E-03             | 2.27E-03 | 9.17E-04             | 10.50 <sup>c</sup> | 1.02E-02             | 2.39E-03 | 1.09E-03             | 9.36 <sup>c</sup>  |
| Buffer 35kb                            | 74436          | 1.04E-02             | 2.40E-03 | 1.24E-03             | 8.39 <sup>c</sup>  | 9.54E-03             | 2.35E-03 | 1.28E-03             | 7.48 <sup>c</sup>  | 1.05E-02             | 2.48E-03 | 1.51E-03             | 6.94 <sup>c</sup>  |
| Buffer 50kb                            | 841092         | 3.22E-02             | 5.29E-03 | 1.50E-02             | 2.15 <sup>c</sup>  | 3.30E-02             | 5.28E-03 | 1.46E-02             | 2.26 <sup>c</sup>  | 2.74E-02             | 5.32E-03 | 1.71E-02             | 1.60 <sup>c</sup>  |
| <i>ROI - Other genomewide variants</i> |                |                      |          |                      |                    |                      |          |                      |                    |                      |          |                      |                    |
| All Other Variants (0kb buffer model)  | 4575485        | 7.14E-02             | 7.82E-03 | 7.40E-02             | 0.97 <sup>c</sup>  | 7.59E-02             | 7.76E-03 | 7.78E-02             | 0.98               | 8.85E-02             | 8.04E-03 | 9.23E-02             | 0.96 <sup>b</sup>  |
| All Other Variants (5kb buffer model)  | 4564670        | 7.08E-02             | 7.80E-03 | 7.60E-02             | 0.93 <sup>c</sup>  | 7.23E-02             | 7.76E-03 | 7.81E-02             | 0.93 <sup>c</sup>  | 8.66E-02             | 8.06E-03 | 9.23E-02             | 0.94 <sup>c</sup>  |
| All Other Variants (10kb buffer model) | 4554197        | 7.35E-02             | 7.85E-03 | 8.13E-02             | 0.90 <sup>c</sup>  | 7.04E-02             | 7.73E-03 | 7.85E-02             | 0.90 <sup>c</sup>  | 8.41E-02             | 8.03E-03 | 9.26E-02             | 0.91 <sup>c</sup>  |
| All Other Variants (25kb buffer model) | 4522144        | 6.65E-02             | 7.72E-03 | 7.57E-02             | 0.88 <sup>c</sup>  | 6.93E-02             | 7.70E-03 | 7.77E-02             | 0.89 <sup>c</sup>  | 8.18E-02             | 7.99E-03 | 9.20E-02             | 0.89 <sup>c</sup>  |
| All Other Variants (35kb buffer model) | 4501049        | 6.61E-02             | 7.71E-03 | 7.53E-02             | 0.88 <sup>c</sup>  | 6.90E-02             | 7.68E-03 | 7.72E-02             | 0.89 <sup>c</sup>  | 8.10E-02             | 7.97E-03 | 9.14E-02             | 0.89 <sup>c</sup>  |
| All Other Variants (50kb buffer model) | 3734393        | 4.37E-02             | 7.37E-03 | 6.66E-02             | 0.66 <sup>c</sup>  | 4.52E-02             | 7.34E-03 | 6.49E-02             | 0.70 <sup>c</sup>  | 6.24E-02             | 7.72E-03 | 7.60E-02             | 0.82 <sup>c</sup>  |

Table shows the estimated enrichment for each fold. Note that components are labelled according to the observed effects used across the models with varied buffer lengths. Consequently, there are no effects for the 0Kb buffer length model. Enrichment (E) reported with two-tailed p-value significance (<sup>a</sup> p<0.05, <sup>b</sup> p<0.01, <sup>c</sup> p<0.001).



### A. Transcriptomic Expression in Model Organisms

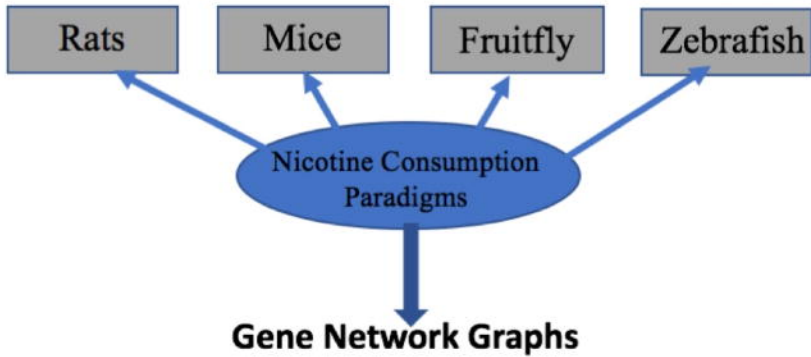

N = ~25000 genes in human genome

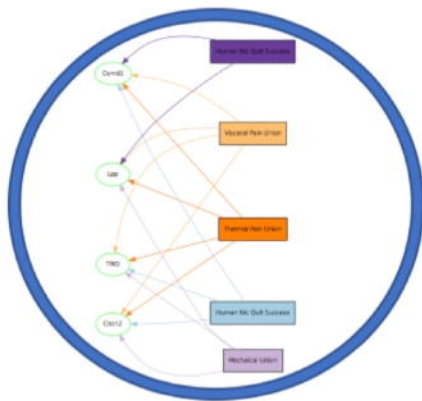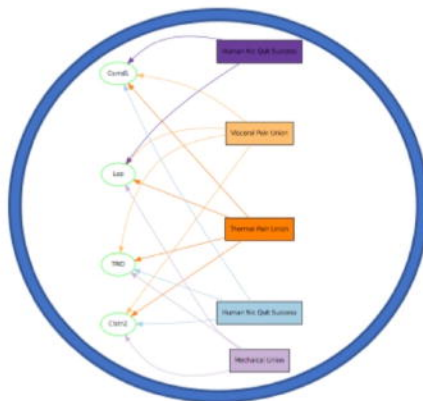

### B. Human Phenotypic Expression

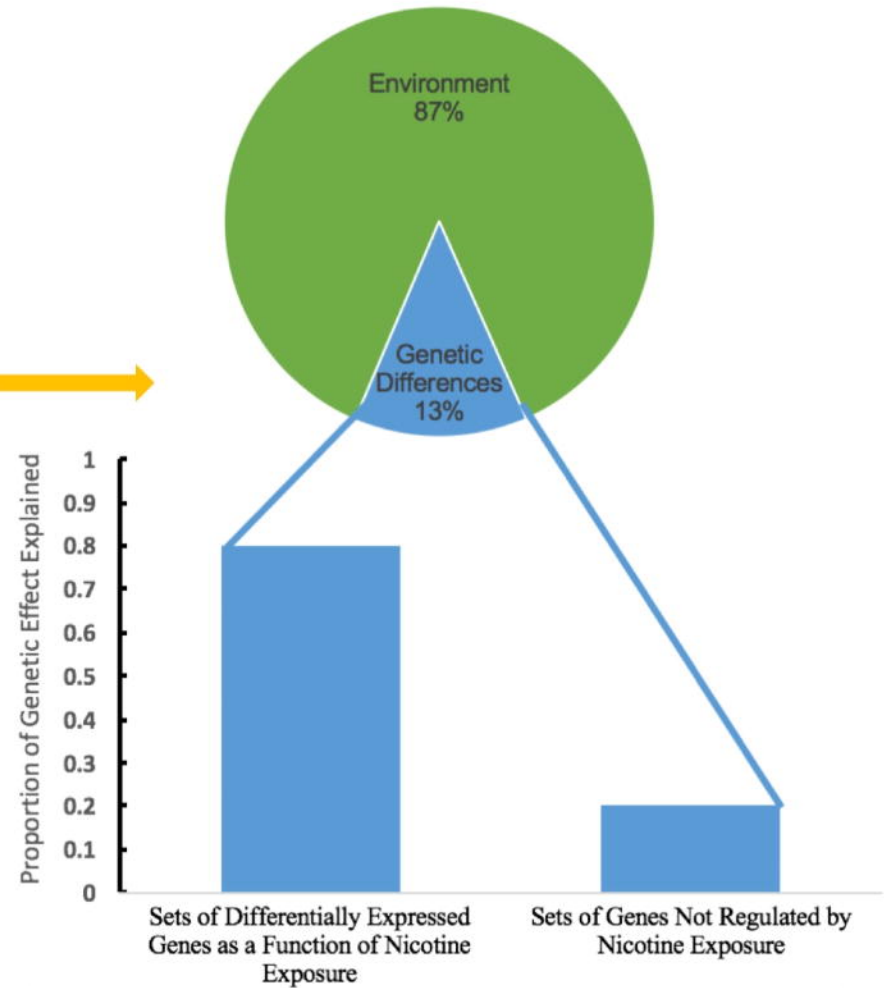

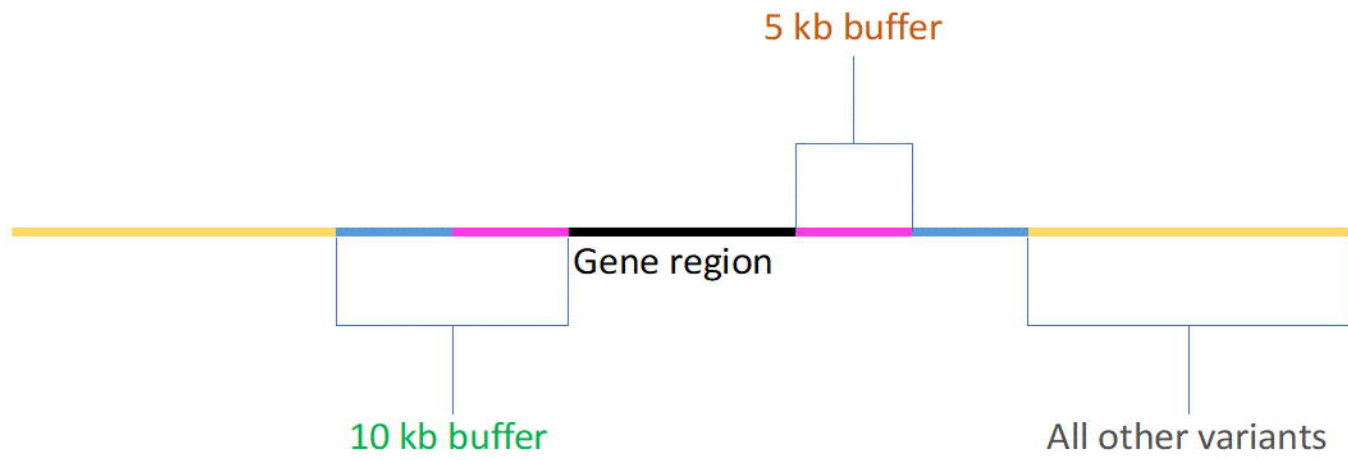

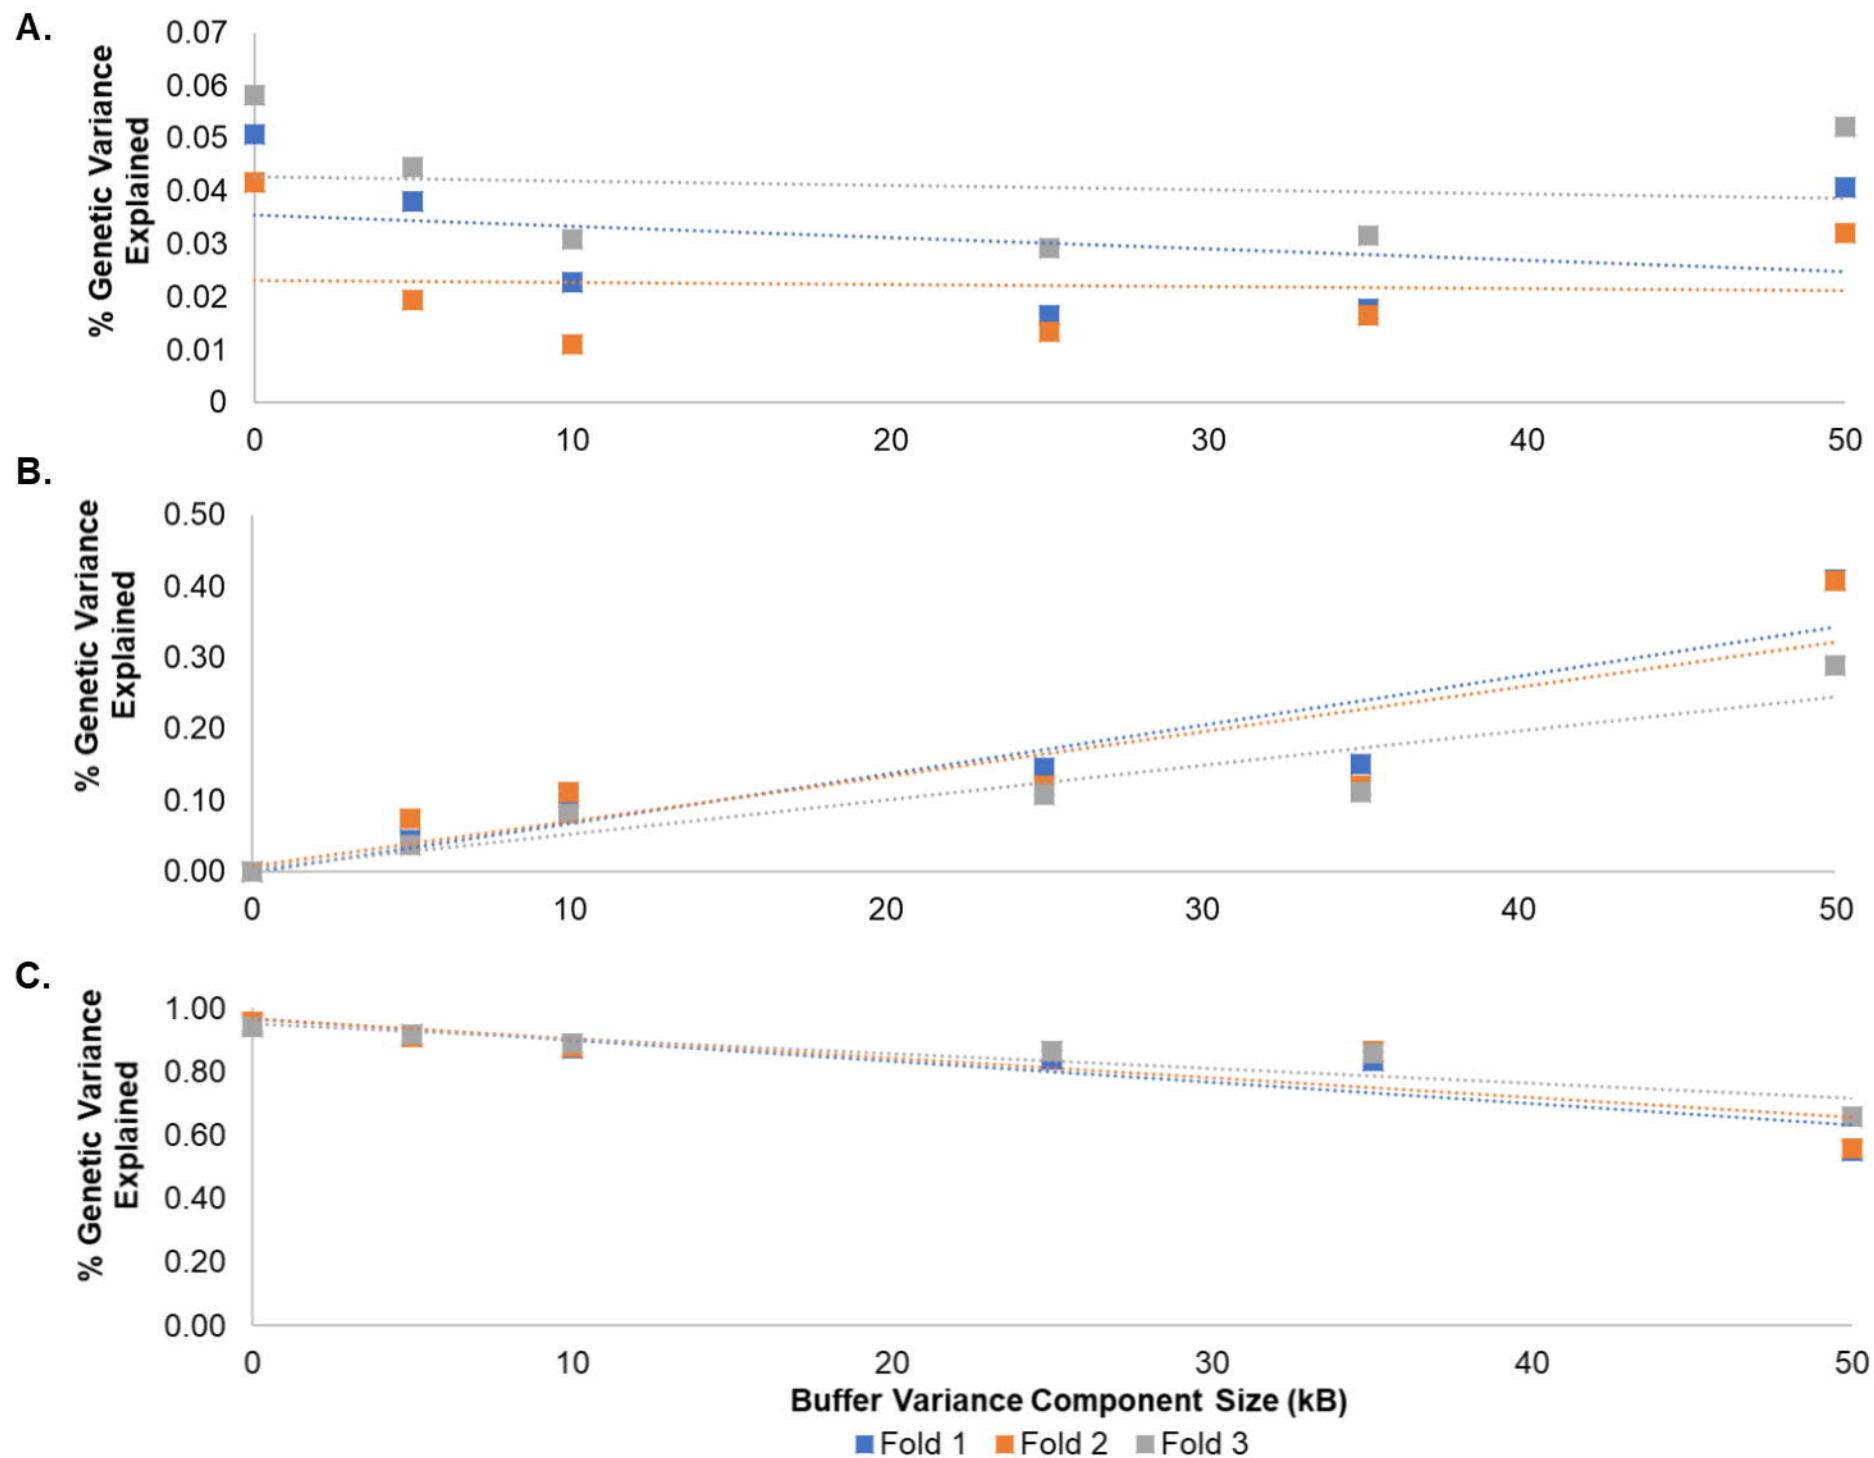

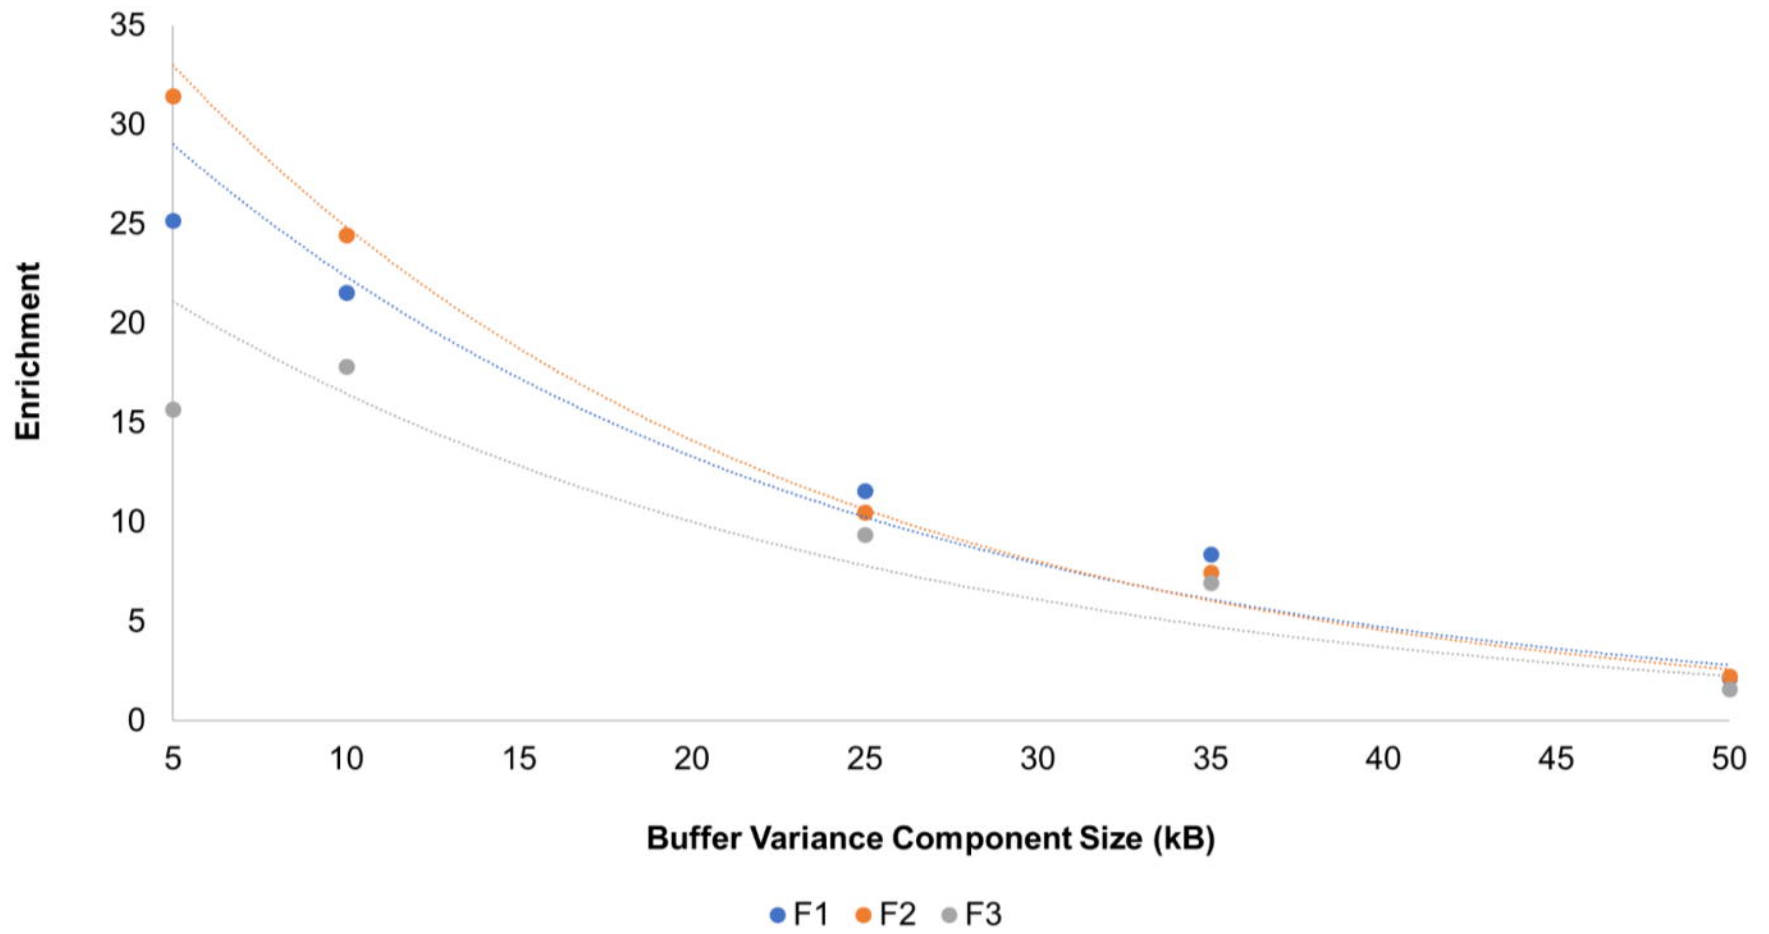

Source: https://www.biorxiv.org/content/10.1101/2019.12.23.887083v1.full.pdf
